# Supplementary material
Source: ML conference proceedings conference paper supplement (https://proceedings.mlr.press/v101/huang19a.html)
Supplement: Supplementary file [file huang19a-supp.pdf]

## Appendix

Below in the Appendix, we list the hyper-parameters we chose for the proposed framework, in addition to the detailed network design displayed in tables.

### Appendix A. Hyper-parameters

The hyper-parameters chosen for our proposed network are:

1.  $l_S = 15$ : maximum number of words in a sentence
2.  $l_P = 5$ : maximum number of phrases in a sentence
3.  $l_W = 5$ : maximum number of words in a phrase
4.  $l_O = 7$ : maximum of objects (bounding boxes) in an image
5.  $D_h = 48$ : depth of hidden states  $h_0$ ,  $h_1$  and  $h_2$
6.  $D_e = 256$ : dimension of sentence, phrase and word embedding
7.  $D_d = 96$ : a chosen hyper-parameter used in the discriminator
8.  $D_z = 100$ : dimension of the noise vector  $z$  and  $F^{ca}$

### Appendix B. Basic Network Blocks

Some network blocks used in our framework are:

1. Up-sampling Block (kernel= $a$ , stride= $b$ ): a nearest neighbour upsampling layer which up-scales the spatial size by 2, a convolution layer with kernel size  $a$  and stride size  $b$ , a batch normalization and a Gated Linear Unit (GLU) layer
2. Down-sampling Block (kernel= $a$ , stride= $b$ ): a convolution layer with kernel size  $a$  and stride size  $b$ , a batch normalization layer and a leaky ReLU layer
3. Spatial Replicate: copy the input along an axis

In the below sections, we report the detailed network architecture for the proposed framework, including the operation in each layer, the input and output tensors.

### Appendix C. Network Architecture for the Generator

| Stage | Sub-stage                    | Name                                          | Input Tensors                                   | Output Tensors                                  |
|-------|------------------------------|-----------------------------------------------|-------------------------------------------------|-------------------------------------------------|
| $G_0$ | Local Path                   | Spatial Replicate                             | $1 \times D_e$                                  | $16 \times 16 \times D_e$                       |
|       |                              | Apply bounding box mask                       | $16 \times 16 \times D_e$                       | $l_O \times 16 \times 16 \times D_e$            |
|       |                              | Average                                       | $l_O \times 16 \times 16 \times D_e$            | $16 \times 16 \times D_e$                       |
|       |                              | Down-sampling (kernel=4, stride=2) $\times 4$ | $16 \times 16 \times D_e$                       | $1 \times 1 \times (D_h \times 8)$              |
|       |                              | Concatenate with noise vector $z$             | $1 \times 1 \times (D_h \times 8), z$           | $1 \times 1 \times (D_h \times 8 + D_z)$        |
|       |                              | Linear + batch norm + GLU                     | $1 \times 1 \times (D_h \times 8 + D_z)$        | $4 \times 4 \times (D_h \times 16)$             |
|       |                              | Up-sampling (kernel=3, stride=1) $\times 2$   | $4 \times 4 \times (D_h \times 16)$             | $16 \times 16 \times (D_h \times 4)$            |
|       |                              | Apply bounding box mask                       | $16 \times 16 \times (D_h \times 4)$            | $l_O \times 16 \times 16 \times (D_h \times 4)$ |
|       |                              | Average                                       | $l_O \times 16 \times 16 \times (D_h \times 4)$ | $16 \times 16 \times (D_h \times 4)$            |
|       | Global Path                  | Concatenation                                 | $z, F^{ca}$                                     | $1 \times (D_h \times 2)$                       |
|       |                              | Linear + batch norm + GLU                     | $1 \times (D_h \times 2)$                       | $4 \times 4 \times (D_h \times 16)$             |
|       |                              | Up-sampling (kernel=3, stride=1) $\times 2$   | $4 \times 4 \times (D_h \times 16)$             | $16 \times 16 \times (D_h \times 4)$            |
|       |                              | Concatenate local and global outputs          |                                                 | $16 \times 16 \times (D_h \times 8)$            |
|       |                              | Upsampling (kernel=3, stride=1) $\times 2$    | $16 \times 16 \times (D_h \times 8)$            | $64 \times 64 \times D_h$                       |
| $G_1$ | Regular-grid-Word Attention  | Linear                                        | $e$                                             | $l_s \times D_h$                                |
|       |                              | $F_n^{attn1}$                                 | $h_0, l_s \times D_h$                           | $64 \times 64 \times D_h$                       |
|       | Object-grid-Phrase Attention | Linear                                        | $p$                                             | $l_p \times D_h$                                |
|       |                              | $F_n^{attn2}$                                 | $h_0, l_p \times D_h$                           | $64 \times 64 \times D_h$                       |
|       |                              | Concatenation                                 | $F_n^{attn1}, F_n^{attn2}, h_0$                 | $64 \times 64 \times (3 \times D_h)$            |
|       |                              | Up-sampling (kernel=3, stride=1)              | $64 \times 64 \times (3 \times D_h)$            | $128 \times 128 \times D_h$                     |
| $G_2$ | Regular-grid-Word Attention  | Linear                                        | $e$                                             | $l_s \times D_h$                                |
|       |                              | $F_n^{attn1}$                                 | $h_1, l_s \times D_h$                           | $128 \times 128 \times D_h$                     |
|       | Object-grid-Phrase Attention | Linear                                        | $p$                                             | $l_p \times D_h$                                |
|       |                              | $F_n^{attn2}$                                 | $h_1, l_p \times D_h$                           | $128 \times 128 \times D_h$                     |
|       |                              | Concatenation                                 | $F_n^{attn1}, F_n^{attn2}, h_0$                 | $128 \times 128 \times (3 \times D_h)$          |
|       |                              | Up-sampling (kernel=3, stride=1)              | $128 \times 128 \times (3 \times D_h)$          | $256 \times 256 \times D_h$                     |

Table 1: Network Architecture for the Generator

## Appendix D. Network Architecture for the Discriminators

### D.1. $D_0$

| Stage                                         | Sub-stage                    | Name                                          | Input Tensors                              | Output Tensors                                    |
|-----------------------------------------------|------------------------------|-----------------------------------------------|--------------------------------------------|---------------------------------------------------|
| Image + Sentence Discriminator                |                              | Convolution + leaky ReLU                      | $64 \times 64 \times 3$                    | $32 \times 32 \times D_d$                         |
|                                               |                              | Down-sampling (kernel=4, stride=2) $\times 3$ | $32 \times 32 \times 96$                   | $f_D^{MG}(4 \times 4 \times (D_d \times 8))$      |
|                                               | $\mathcal{D}(x)$             | Convolution (Image only logits)               | $4 \times 4 \times (D_d \times 8)$         | 1                                                 |
|                                               | $\mathcal{D}(x, \bar{e})$    | \textbf{Sentence conditioned logits}          | $f_D^{MG}, \bar{e}$                        | 1                                                 |
| Image + Sentence + Bounding Box Discriminator |                              | Convolution                                   | $64 \times 64 \times 3$                    | $32 \times 32 \times D_d$                         |
|                                               |                              | Down-sampling (kernel=4, stride=2)            | $32 \times 32 \times D_d$                  | $f_D^{MG^2}(16 \times 16 \times (D_d \times 2))$  |
|                                               |                              | Spatial Replicate                             | $\bar{e}$                                  | $16 \times 16 \times D_e$                         |
|                                               |                              | Concatenation                                 | $16 \times 16 \times D_e, f_D^{MG^2}$      | $16 \times 16 \times (D_e + D_d \times 2)$        |
|                                               |                              | Apply bounding box mask                       | $16 \times 16 \times (D_e + D_d \times 2)$ | $16 \times 16 \times (D_e + D_d \times 2)$        |
|                                               |                              | Down-sampling (kernel=4, stride=2) $\times 2$ | $16 \times 16 \times (D_e + D_d \times 2)$ | $f_D^{MG-BBOX}(4 \times 4 \times (D_d \times 8))$ |
| Sentence conditioned logits                   | $\mathcal{D}(x, \bar{e}, b)$ | \textbf{Sentence conditioned logits}          | $f_D^{MG-BBOX}, \bar{e}$                   | 1                                                 |
|                                               |                              | Spatial replicate                             | $\bar{e}$                                  | $4 \times 4 \times D_e$                           |
|                                               |                              | Concatenation                                 | $f_D^{MG}$ or $f_D^{MG-BBOX}, \bar{e}$     | $4 \times 4 \times (D_e + D_d \times 8)$          |
|                                               |                              | Down-sampling (kernel=3, stride=1)            | $4 \times 4 \times (D_e + D_d \times 8)$   | $4 \times 4 \times (D_d \times 8)$                |
|                                               |                              | Convolution                                   | $4 \times 4 \times (D_d \times 8)$         | 1                                                 |

Table 2: Network Architecture for  $D_0$

APPENDIX

D.2.  $D_1$

| Stage                                         | Sub-stage                    | Name                                          | Input Tensors                                         | Output Tensors                                        |
|-----------------------------------------------|------------------------------|-----------------------------------------------|-------------------------------------------------------|-------------------------------------------------------|
| Image + Sentence Discriminator                |                              | Convolution + ReLU                            | $128 \times 128 \times 3$                             | $64 \times 64 \times D_d$                             |
|                                               |                              | Down-sampling (kernel=4, stride=2) $\times 4$ | $64 \times 64 \times 96$                              | $f_D^{MG}(4 \times 4 \times (D_d \times 16))$         |
|                                               |                              | Down-sampling (kernel=3, stride=1)            | $f_D^{MG}(4 \times 4 \times (D_d \times 16))$         | $f_D^{MG}(4 \times 4 \times (D_d \times 8))$          |
|                                               | $\mathcal{D}(x)$             | Convolution (Image only logits)               | $4 \times 4 \times (D_d \times 8)$                    | 1                                                     |
|                                               | $\mathcal{D}(x, \bar{e})$    | \textbf{Sentence conditioned logits}          | $f_D^{MG}, \bar{e}$                                   | 1                                                     |
| Image + Sentence + Bounding Box Discriminator |                              | Convolution                                   | $128 \times 128 \times 3$                             | $64 \times 64 \times D_d$                             |
|                                               |                              | Down-sampling (kernel=4, stride=2) $\times 2$ | $64 \times 64 \times D_d$                             | $f_D^{MG^2}(16 \times 16 \times (D_d \times 4))$      |
|                                               |                              | Spatial Replicate                             | $\bar{e}$                                             | $16 \times 16 \times D_e$                             |
|                                               |                              | Concatenation                                 | $16 \times 16 \times D_e, f_D^{MG^2}$                 | $16 \times 16 \times (D_e + D_d \times 4)$            |
|                                               |                              | Apply bounding box mask                       | $16 \times 16 \times (D_e + D_d \times 2)$            | $l_O \times 16 \times 16 \times (D_e + D_d \times 4)$ |
|                                               |                              | Average                                       | $l_O \times 16 \times 16 \times (D_e + D_d \times 4)$ | $16 \times 16 \times (D_e + D_d \times 4)$            |
|                                               |                              | Down-sampling (kernel=4, stride=2) $\times 2$ | $16 \times 16 \times (D_e + D_d \times 2)$            | $4 \times 4 \times (D_d \times 16)$                   |
|                                               |                              | Down-sampling (kernel=3, stride=1)            | $f_D^{MG-BBOX}(4 \times 4 \times (D_d \times 16))$    | $f_D^{MG-BBOX}(4 \times 4 \times (D_d \times 8))$     |
|                                               | $\mathcal{D}(x, \bar{e}, b)$ | \textbf{Sentence conditioned logits}          | $f_D^{MG-BBOX}, \bar{e}$                              | 1                                                     |
|                                               |                              | Spatial replicate                             | $\bar{e}$                                             | $4 \times 4 \times D_e$                               |
| Sentence conditioned logits                   |                              | Concatenation                                 | $f_D^{MG}$ or $f_D^{MGnBBOX}, \bar{e}$                | $4 \times 4 \times (D_e + D_d \times 8)$              |
|                                               |                              | Down-sampling (kernel=3, stride=1)            | $4 \times 4 \times (D_e + D_d \times 8)$              | $4 \times 4 \times (D_d \times 8)$                    |
|                                               |                              | Convolution                                   | $4 \times 4 \times (D_d \times 8)$                    | 1                                                     |

Table 3: Network Architecture for  $D_1$

D.3.  $D_2$

| Stage                                         | Sub-stage                    | Name                                                     | Input Tensors                                         | Output Tensors                                        |
|-----------------------------------------------|------------------------------|----------------------------------------------------------|-------------------------------------------------------|-------------------------------------------------------|
| Image + Sentence Discriminator                |                              | Convolution + leaky ReLU                                 | $256 \times 256 \times 3$                             | $128 \times 128 \times D_d$                           |
|                                               |                              | Down-sampling $\times 3$ (kernel=4, stride=2)            | $128 \times 128 \times D_d$                           | $f_D^{MG}(16 \times 16 \times (D_d \times 8))$        |
|                                               |                              | Down-sampling (kernel=3, stride=1) $\times 2$            | $f_D^{MG}(4 \times 4 \times (D_d \times 16))$         | $f_D^{MG}(4 \times 4 \times (D_d \times 8))$          |
|                                               | $\mathcal{D}(x)$             | Convolution (Image only logits)                          | $4 \times 4 \times (D_d \times 8)$                    | 1                                                     |
|                                               | $\mathcal{D}(x, \bar{e})$    | Sentence conditioned logits                              | $f_D^{MG}, \bar{e}$                                   | 1                                                     |
| Image + Sentence + Bounding Box Discriminator |                              | Convolution + leaky ReLU                                 | $256 \times 256 \times 3$                             | $128 \times 128 \times D_d$                           |
|                                               |                              | Down-sampling $\times 3$ (kernel=4, stride=2)            | $128 \times 128 \times D_d$                           | $f_D^{MG^2}(16 \times 16 \times (D_d \times 8))$      |
|                                               |                              | Spatial Replicate                                        | $\bar{e}$                                             | $16 \times 16 \times D_e$                             |
|                                               |                              | Concatenation                                            | $16 \times 16 \times D_e, f_D^{MG^2}$                 | $16 \times 16 \times (D_e + D_d \times 8)$            |
|                                               |                              | Apply bounding box mask                                  | $16 \times 16 \times (D_e + D_d \times 8)$            | $l_O \times 16 \times 16 \times (D_e + D_d \times 8)$ |
|                                               |                              | Average                                                  | $l_O \times 16 \times 16 \times (D_e + D_d \times 8)$ | $16 \times 16 \times (D_e + D_d \times 8)$            |
|                                               |                              | Down-sampling $\times 2$ (kernel=4, stride=2) $\times 2$ | $16 \times 16 \times (D_e + D_d \times 2)$            | $4 \times 4 \times (D_d \times 32)$                   |
|                                               |                              | Down-sampling (kernel=3, stride=1) $\times 2$            | $f_D^{MG-BBOX}(4 \times 4 \times (D_d \times 32))$    | $f_D^{MG-BBOX}(4 \times 4 \times (D_d \times 8))$     |
|                                               | $\mathcal{D}(x, \bar{e}, b)$ | Sentence conditioned logits                              | $f_D^{MG-BBOX}, \bar{e}$                              | 1                                                     |
|                                               |                              | Spatial replicate                                        | $\bar{e}$                                             | $4 \times 4 \times D_e$                               |
| Sentence conditioned logits                   |                              | Concatenation                                            | $f_D^{MG}$ or $f_D^{MGnBBOX}, \bar{e}$                | $4 \times 4 \times (D_e + D_d \times 8)$              |
|                                               |                              | Down-sampling (kernel=3, stride=1)                       | $4 \times 4 \times (D_e + D_d \times 8)$              | $4 \times 4 \times (D_d \times 8)$                    |
|                                               |                              | Convolution                                              | $4 \times 4 \times (D_d \times 8)$                    | 1                                                     |

Table 4: Network Architecture for  $D_2$
